# Supplementary material for: Relationship of Effective Circulating Volume with Sublingual Red Blood Cell Velocity and Microvessel Pressure Difference: A Clinical Investigation and Computational Fluid Dynamics Modeling
Source: MDPI journal article supplement (doi:10.3390/jcm11164885), 2022-08-20
Supplement: s1 [file s1]

*Supplemental Material***Figure S1**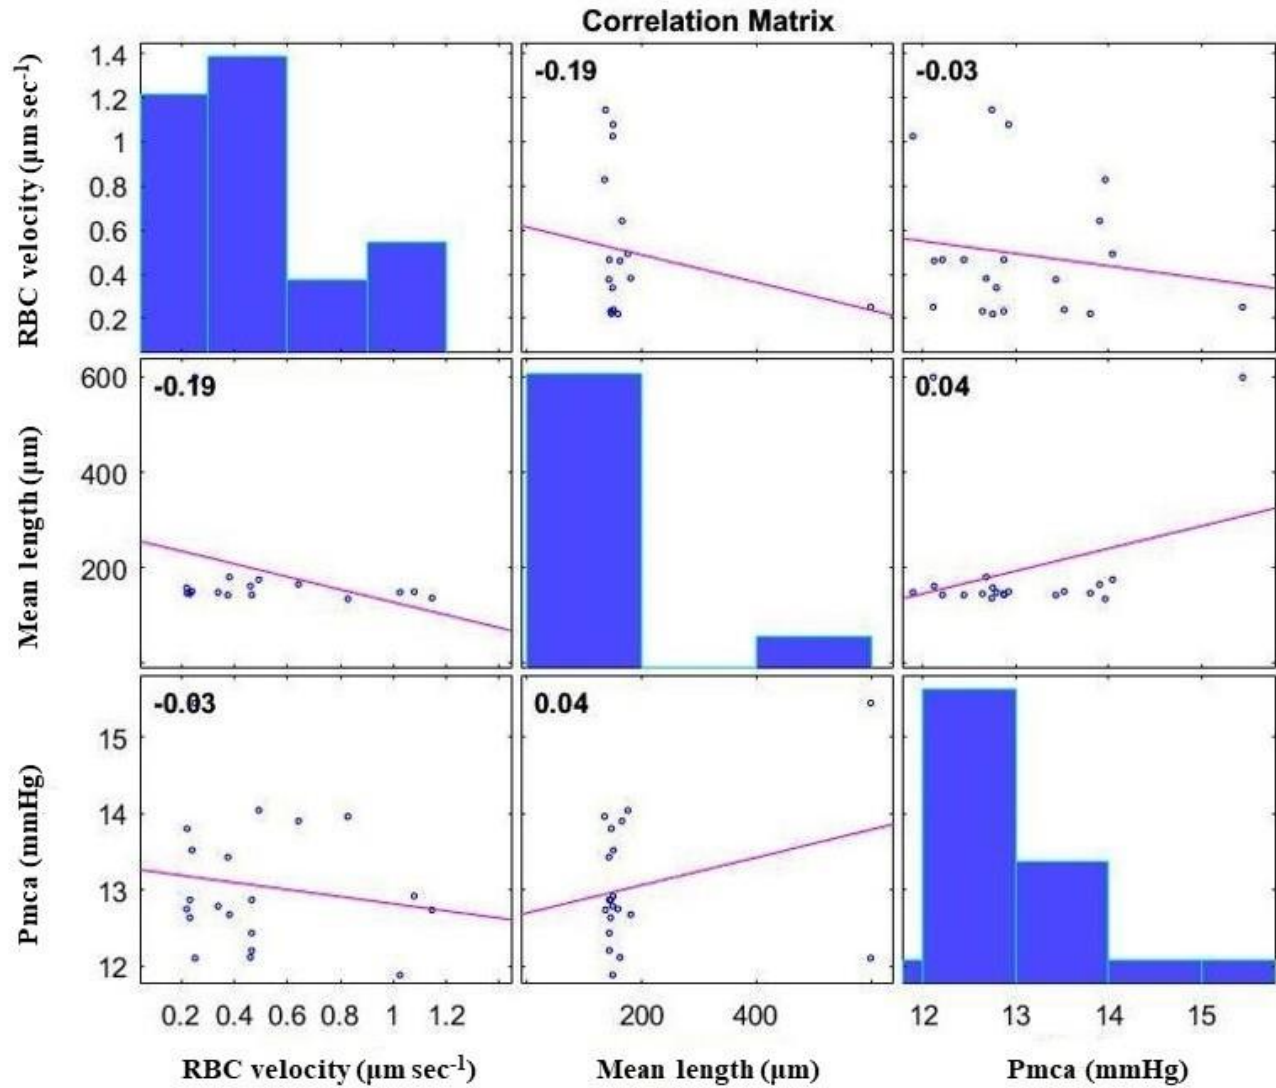**Figure S1.** Correlations between Pmca, microvessel length, and RBC velocity.

**Figure S2**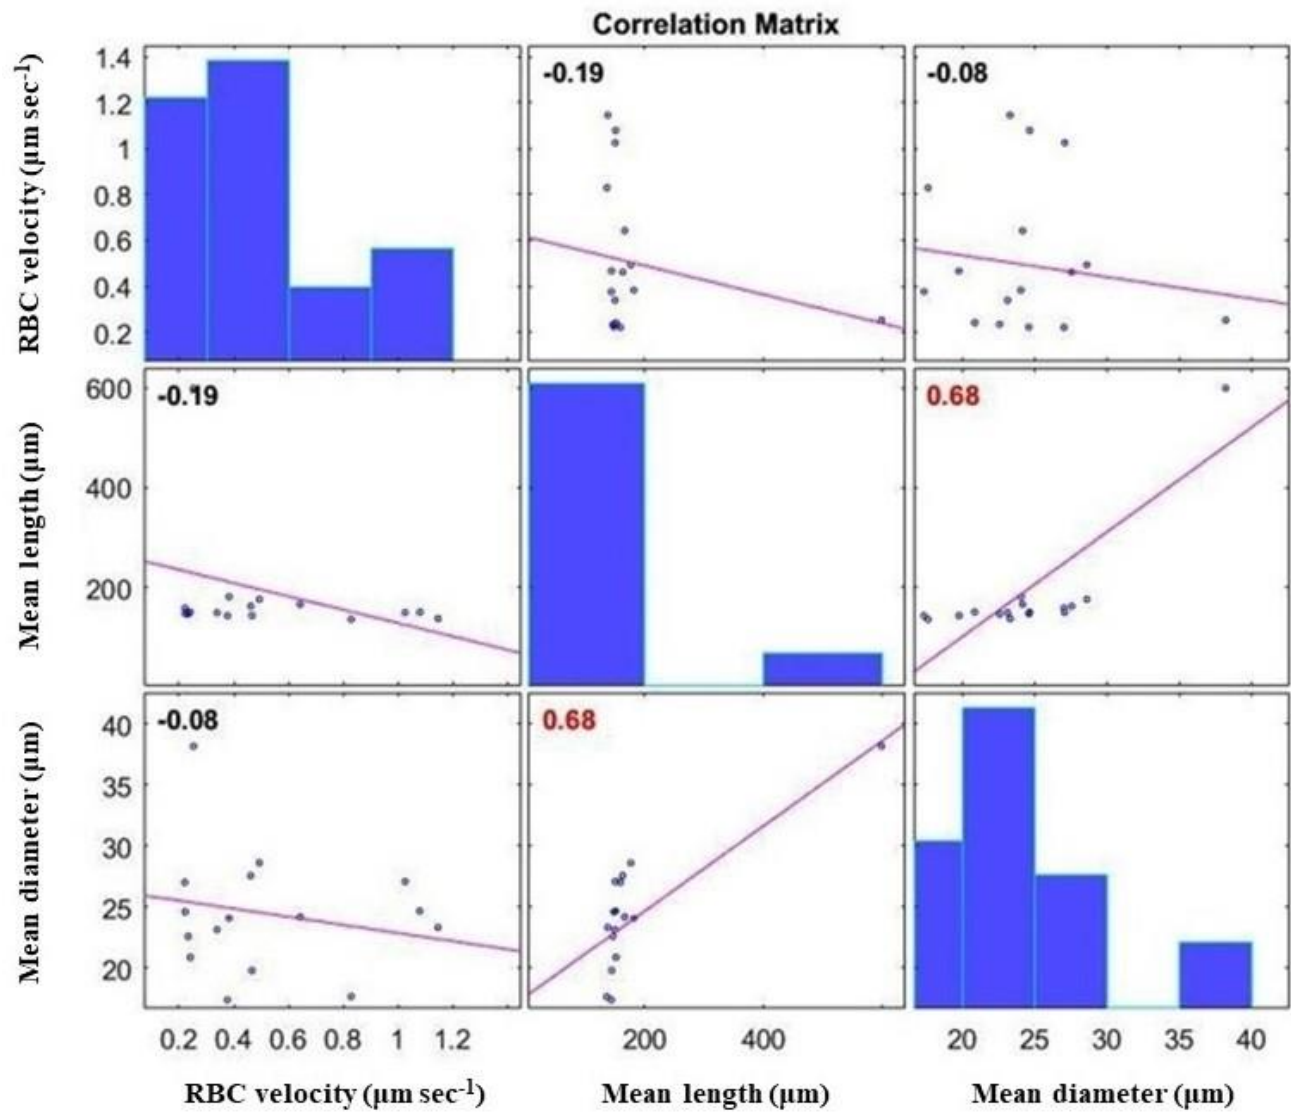**Figure S2.** Correlations of RBC velocity with microvessel length and diameter.

**Figure S3**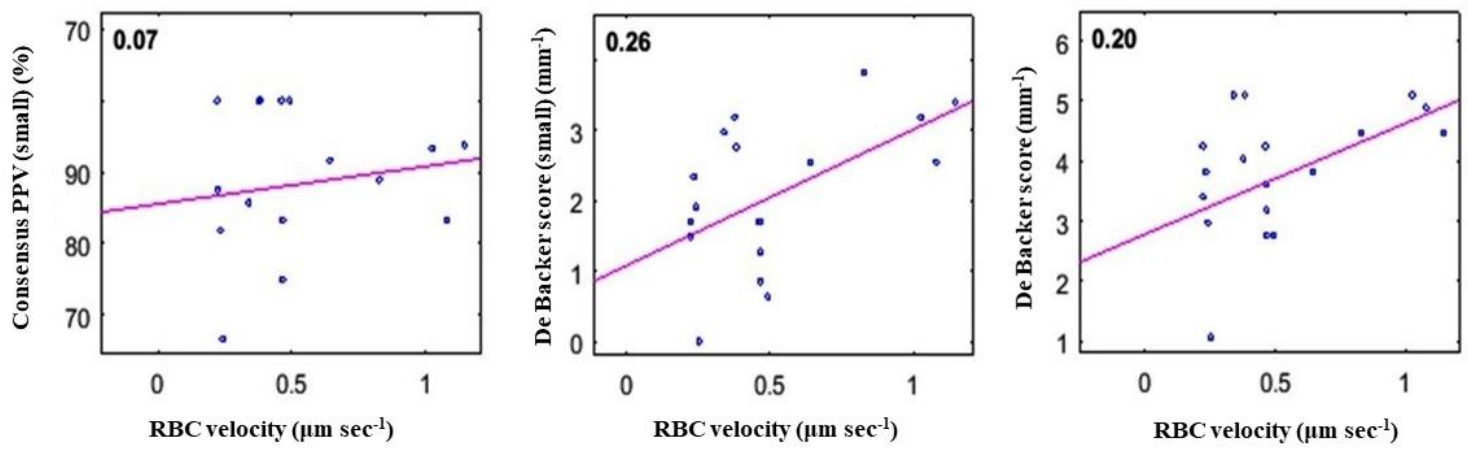

**Figure S3.** Correlation of sublingual RBC velocity with Consensus PPV (small), De Backer score (small), and De Backer score.

**Figure S4**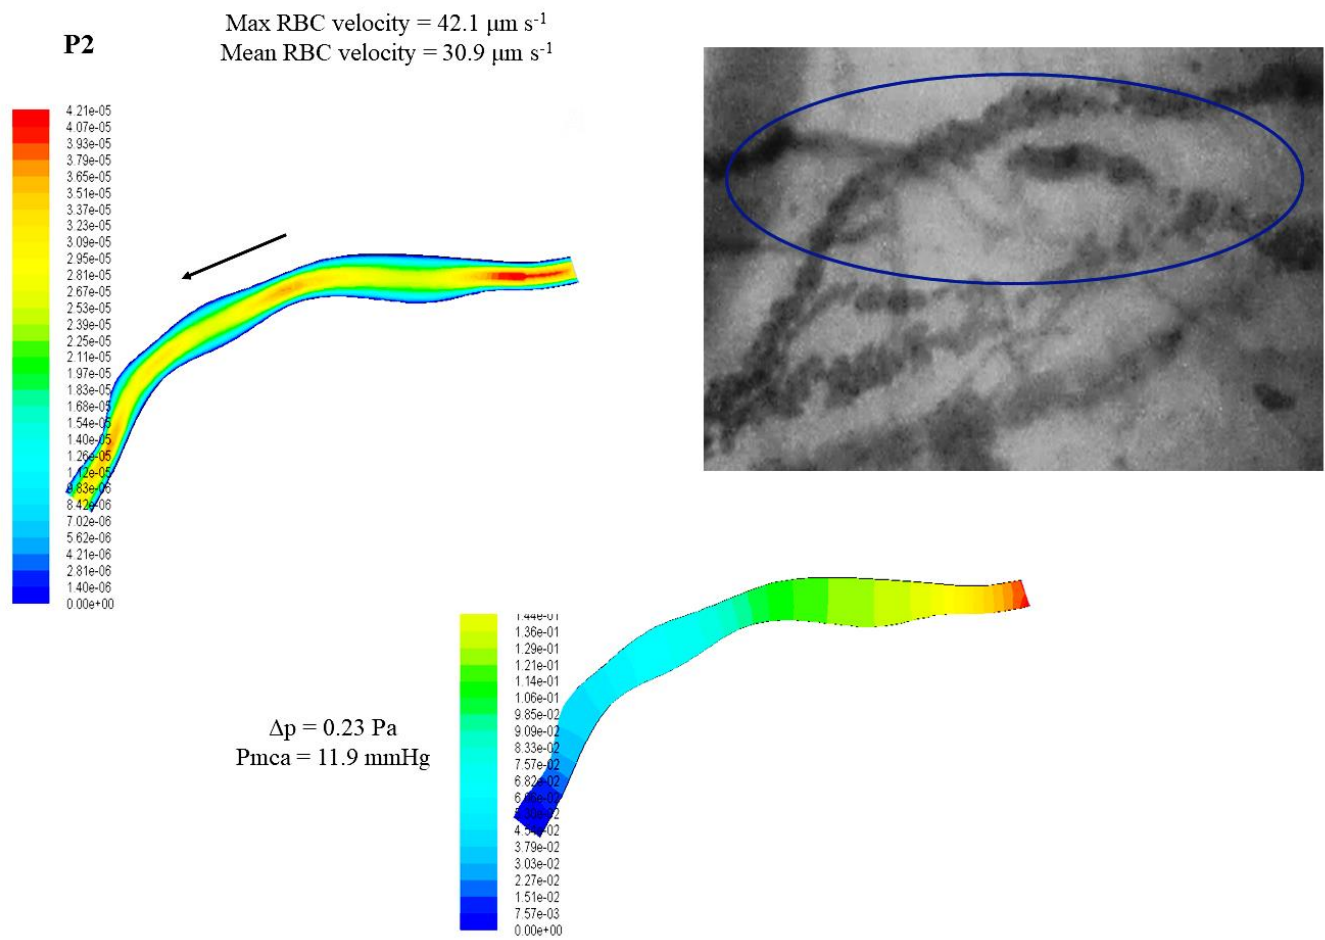**Figure S4.** Reconstruction of the 2D microvessel and application of CFD to evaluate the velocity and pressure fields in microvessels.

**Figure S5****P3**

Max RBC velocity =  $20.8 \mu\text{m s}^{-1}$   
 Mean RBC velocity =  $11.5 \mu\text{m s}^{-1}$

$\Delta p = 0.04 \text{ Pa}$   
 $P_{mca} = 12.7 \text{ mmHg}$

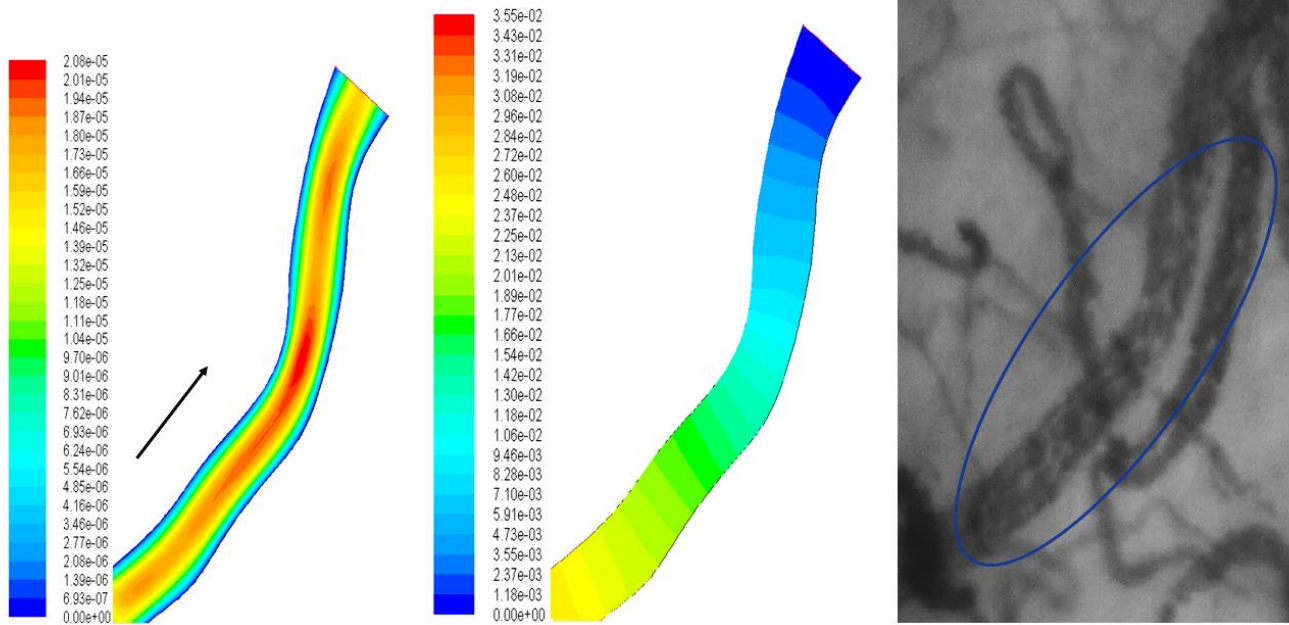

**Figure S5.** Reconstruction of the 2D microvessel and application of CFD to evaluate the velocity and pressure fields in microvessels.

**Figure S6**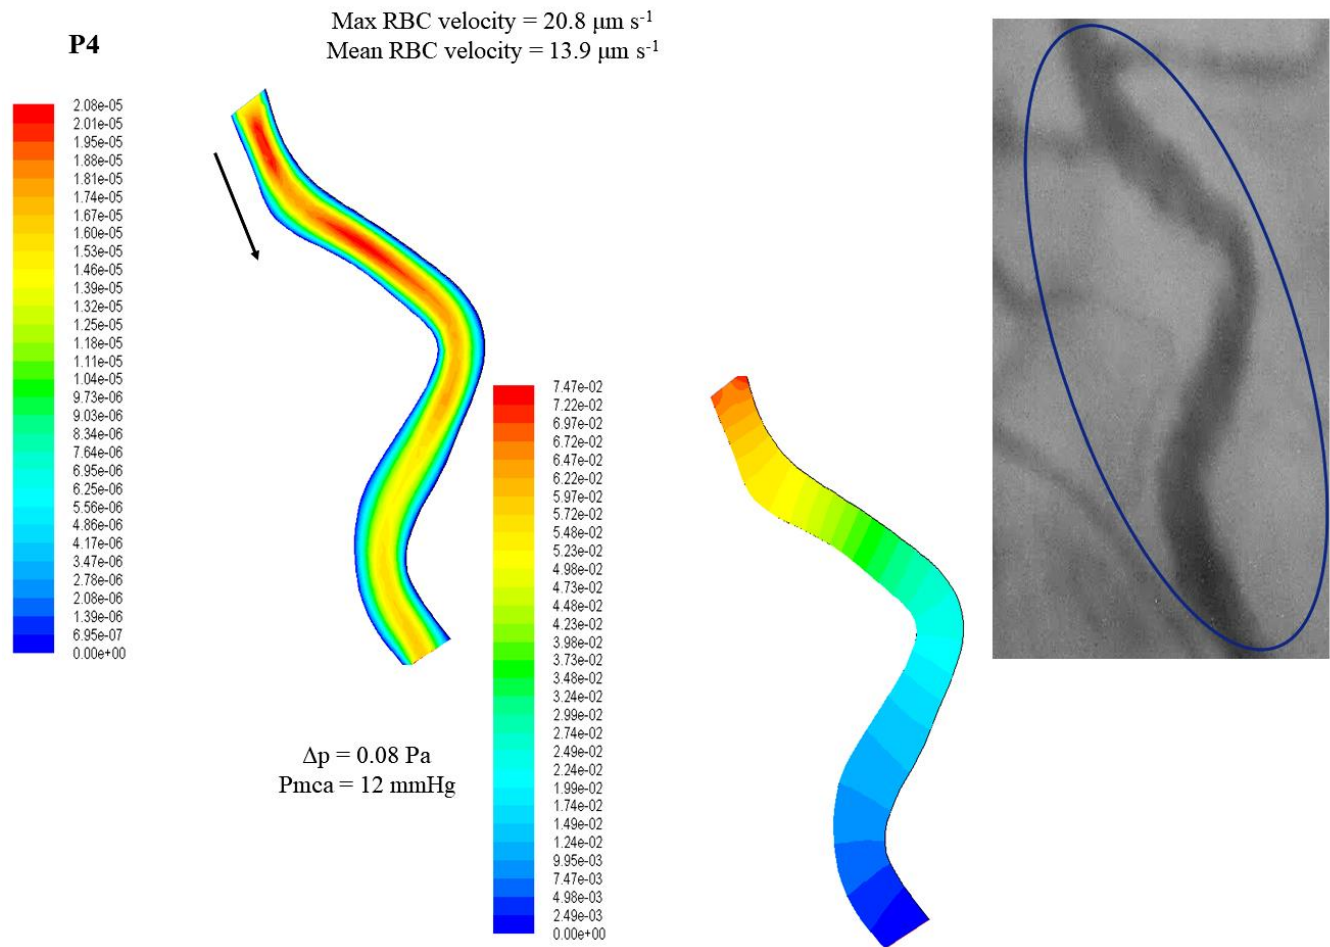

**Figure S6.** Reconstruction of the 2D microvessel and application of CFD to evaluate the velocity and pressure fields in microvessels.

**Figure S7**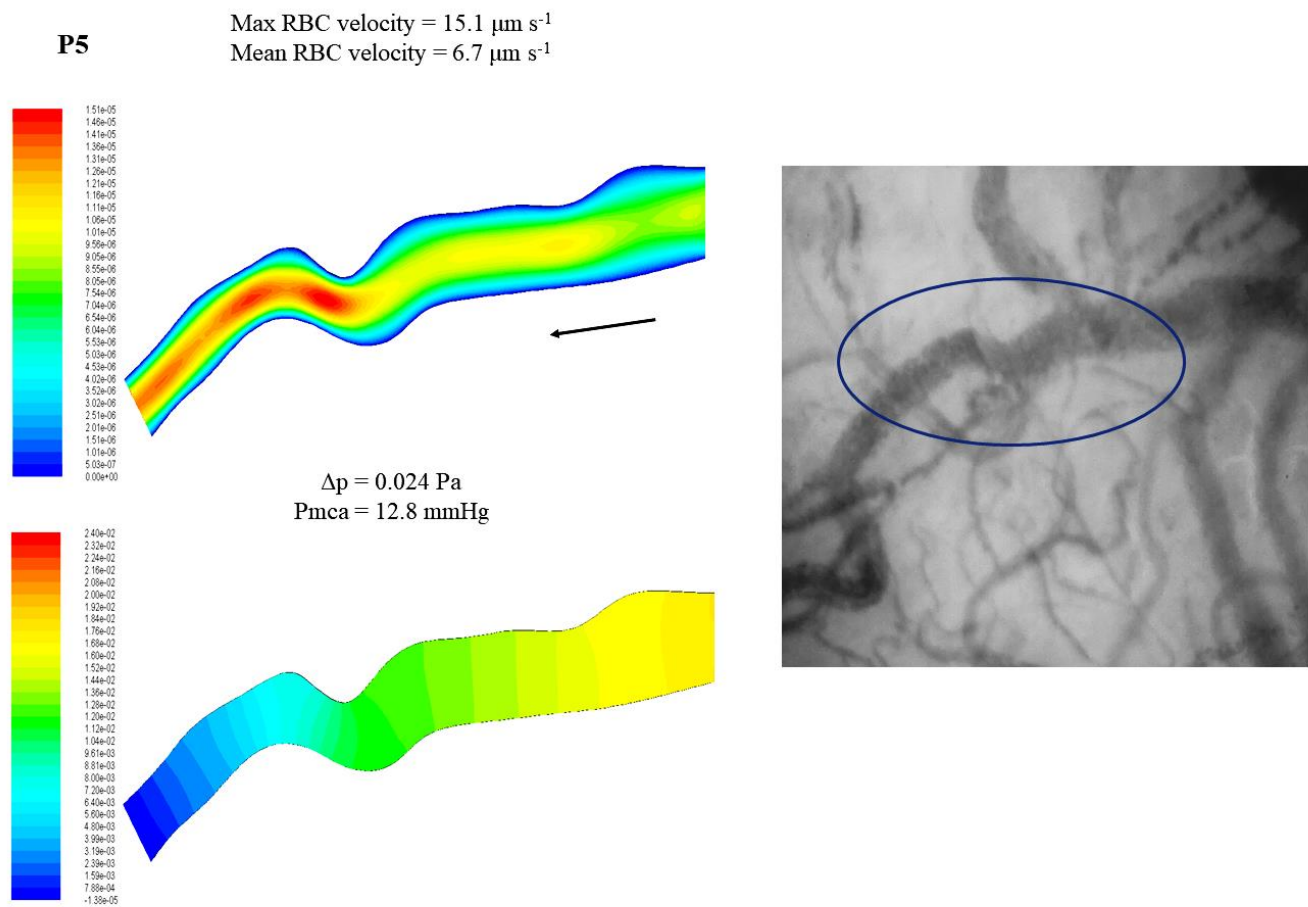

**Figure S7.** Reconstruction of the 2D microvessel and application of CFD to evaluate the velocity and pressure fields in microvessels.



**Figure S8**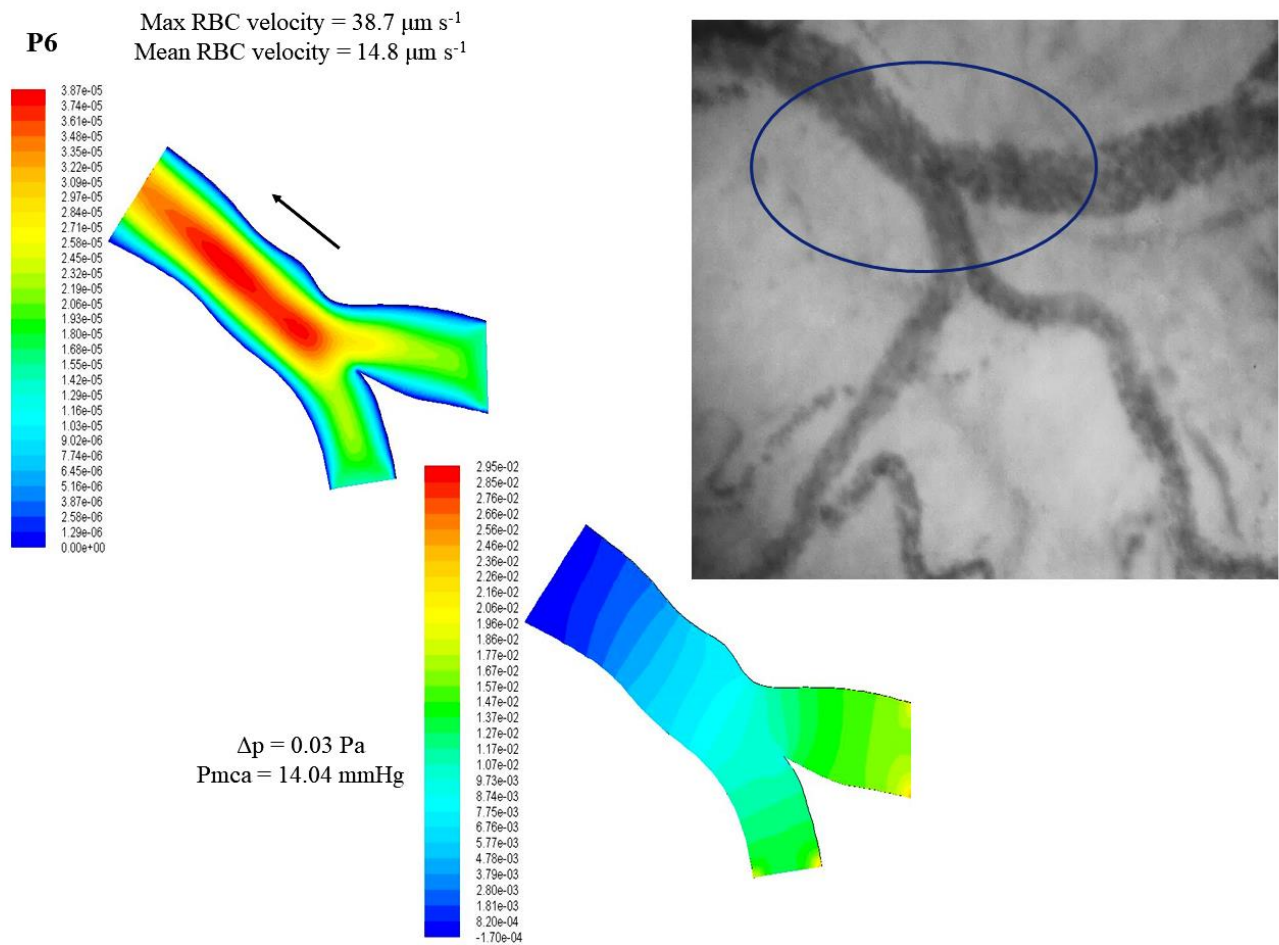**Figure S8.** Reconstruction of the 2D microvessel and application of CFD to evaluate the velocity and pressure fields in microvessels.



**Figure S9**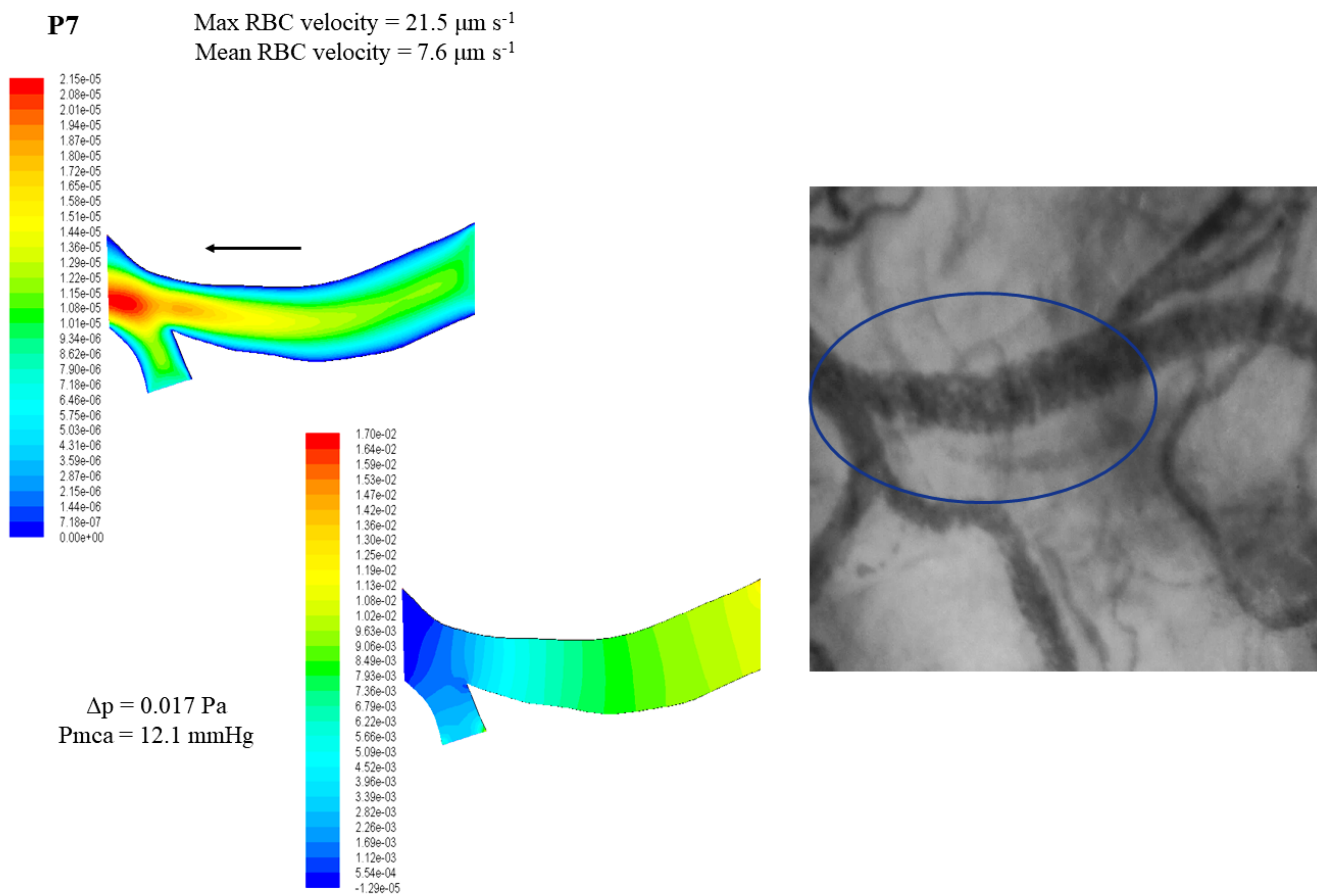**Figure S9.** Reconstruction of the 2D microvessel and application of CFD to evaluate the velocity and pressure fields in microvessels.

**Figure S10**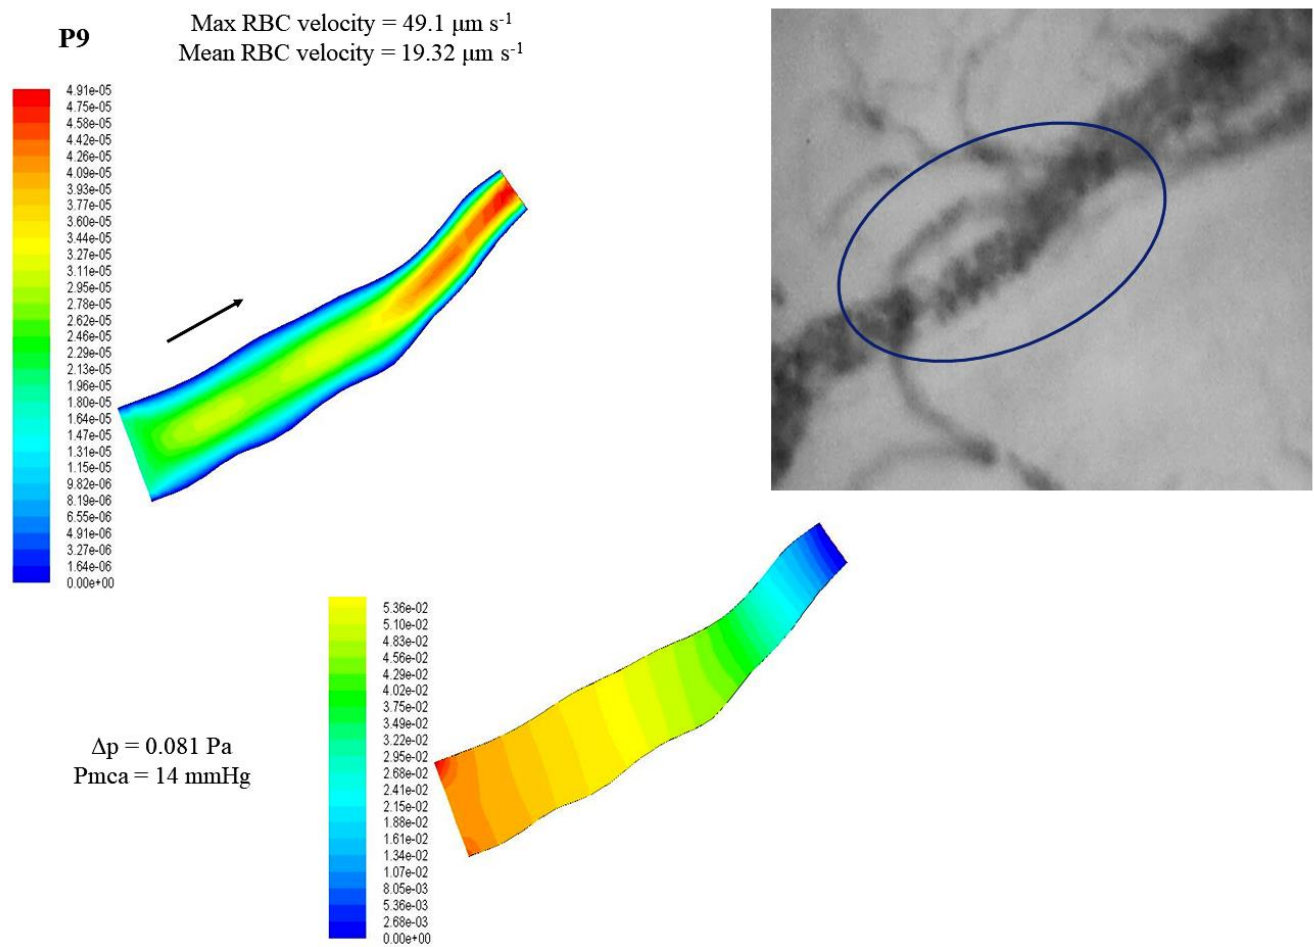

**Figure S10.** Reconstruction of the 2D microvessel and application of CFD to evaluate the velocity and pressure fields in microvessels.

**Figure S11**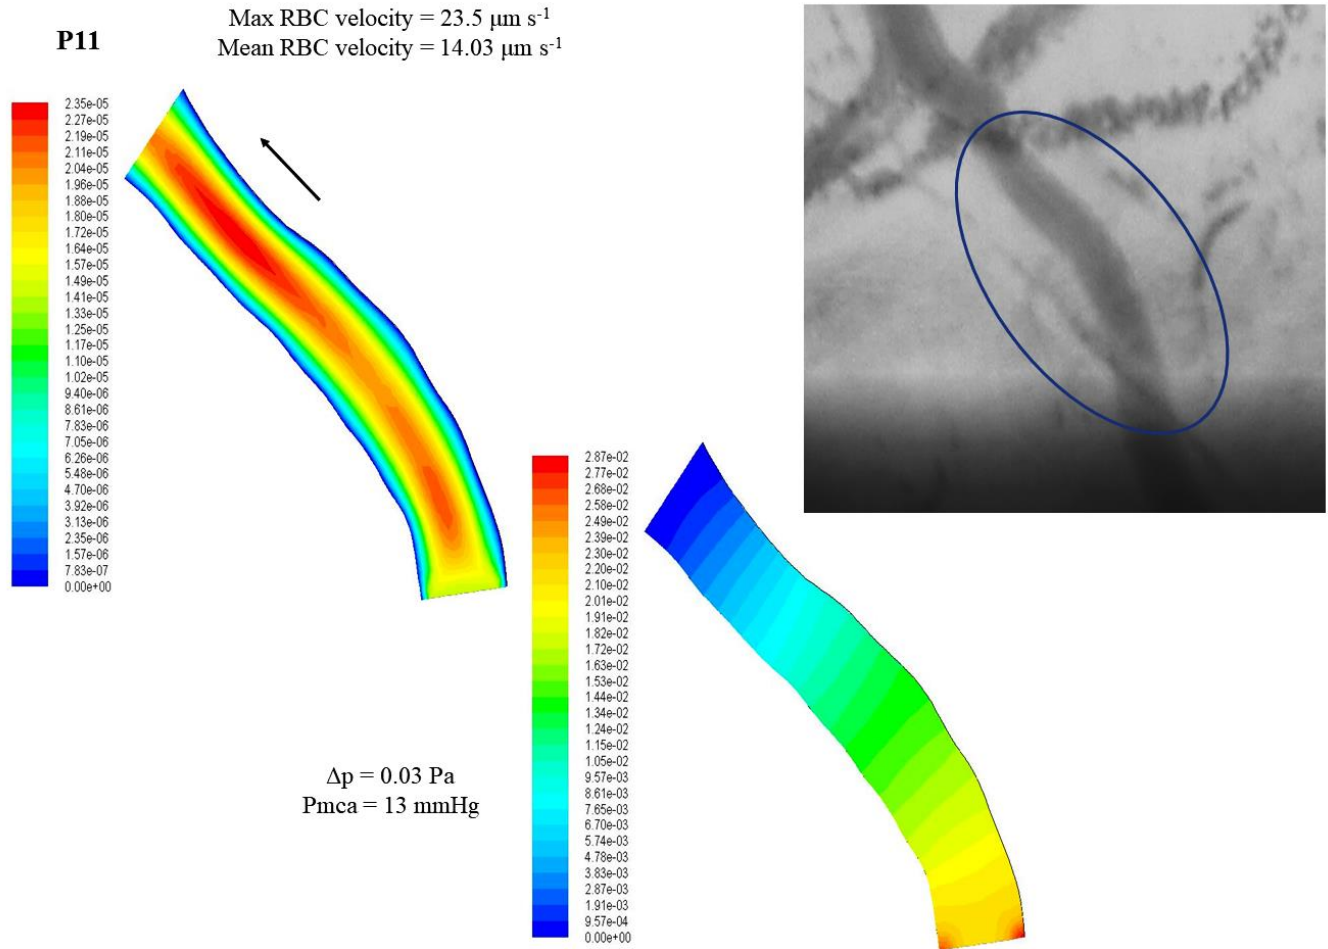

**Figure S11.** Reconstruction of the 2D microvessel and application of CFD to evaluate the velocity and pressure fields in microvessels.

**Figure S12**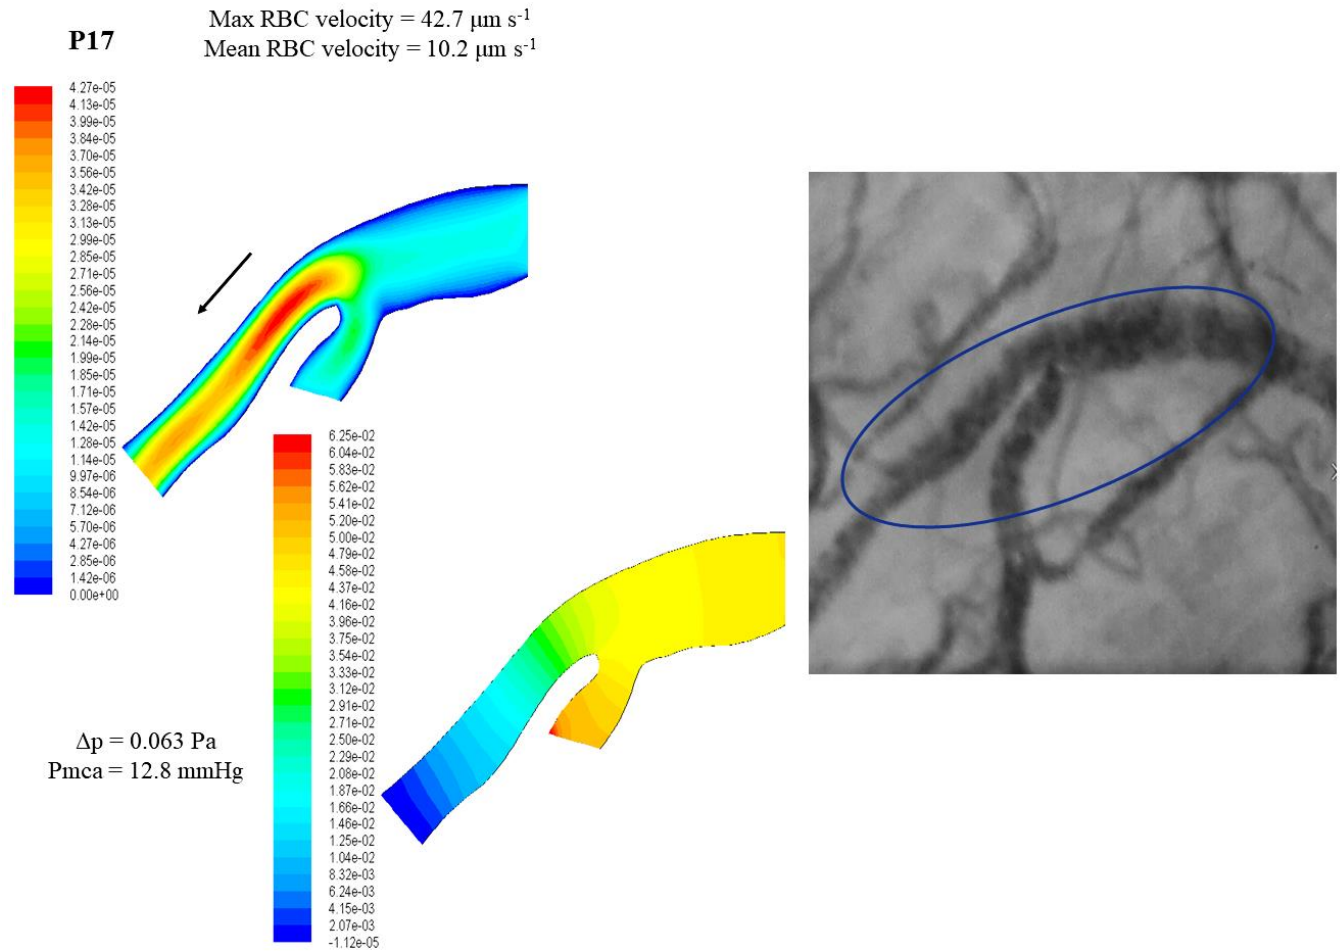

**Figure S12.** Reconstruction of the 2D microvessel and application of CFD to evaluate the velocity and pressure fields in microvessels.

**Figure S13**

# Bootstrapping

Pmca vs. max RBC velocity  
 $r = -0.14$ ,  $p = 0.28$   
 $n = 30$

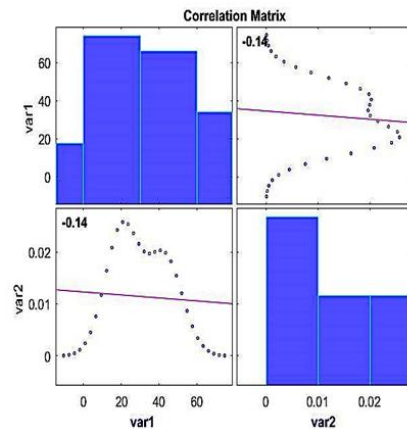

Pmca vs. mean RBC velocity  
 $r = -0.07$ ,  $p = 0.61$   
 $n = 30$

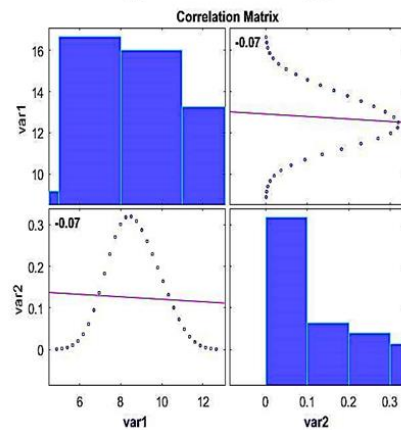

Pmca vs.  $\Delta p$   
 $r = -0.30$ ,  $p = 0.02$   
 $n = 30$

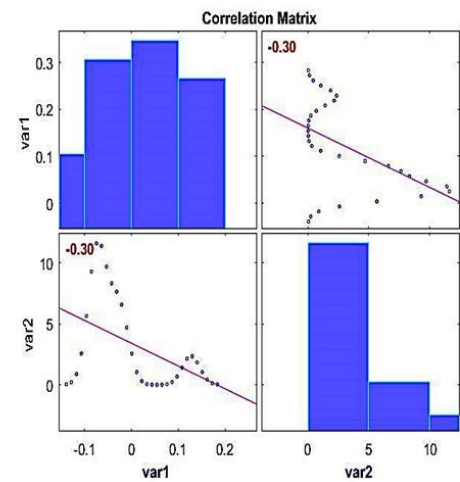

**Figure S13.** Bootstrapping metrics analysis ( $n=30$ ) investigating the correlation between Pmca and  $\Delta p$ .

**Table S1. Baseline characteristics of the patients**

|                                                   |                   |
|---------------------------------------------------|-------------------|
| Age (years), median (IQR)                         | 39.5 (35.5-44.5)  |
| Sex - male, n (%)                                 | 12 (60)           |
| Sex - female, n (%)                               | 8 (40)            |
| BMI (kg m <sup>-2</sup> ), median (IQR)           | 25.1 (23.15-25.8) |
| Body Surface Area (m <sup>2</sup> ), median (IQR) | 1.94 (1.83-2.02)  |
| Type of planned surgery                           |                   |
| Gastrointestinal, n (%)                           | 7 (35)            |
| Gynecological, n (%)                              | 3 (15)            |
| Thyroidectomy, n (%)                              | 2 (10)            |
| Urological, n (%)                                 | 8 (40)            |

**Table S2. Baseline anesthetic parameters 30 min after induction of anesthesia (mean  $\pm$  SD)**

|                                                       |                |
|-------------------------------------------------------|----------------|
| Bispectral index                                      | 42.5 $\pm$ 1.5 |
| Temperature ( $^{\circ}$ C)                           | 36.7 $\pm$ 0.1 |
| Tidal volume (ml kg <sup>-1</sup> IBW)                | 560 $\pm$ 52.2 |
| Respiratory rate (min <sup>-1</sup> )                 | 13.7 $\pm$ 1.1 |
| Positive end-expiratory pressure (cmH <sub>2</sub> O) | 5 $\pm$ 0      |
| End-tidal carbon dioxide (mmHg)                       | 36.9 $\pm$ 0.9 |
| Peak inspiratory pressure (cmH <sub>2</sub> O)        | 17.8 $\pm$ 1.3 |
| Plateau pressure (cmH <sub>2</sub> O)                 | 16 $\pm$ 1.4   |

IBW, ideal body weight.



**Table S3. Correlation of sublingual RBC velocity with sublingual density and flow variables**

|                         | RBC velocity | Consensus PPV (small) | Consensus PPV | De Backer score (small) | De Backer score |
|-------------------------|--------------|-----------------------|---------------|-------------------------|-----------------|
| RBC velocity            |              | <b>0.07</b>           | -0.02         | <b>0.26</b>             | <b>0.2</b>      |
| Consensus PPV (small)   | <b>0.07</b>  |                       | <b>0.84</b>   | <b>0.19</b>             | <b>0.32</b>     |
| Consensus PPV           | -0.02        | <b>0.84</b>           |               | -0.13                   | <b>0.04</b>     |
| De Backer score (small) | <b>0.26</b>  | <b>0.19</b>           | -0.13         |                         | <b>0.68</b>     |
| De Backer score         | <b>0.2</b>   | <b>0.32</b>           | <b>0.04</b>   | <b>0.68</b>             |                 |

Red color: statistically significant positive correlations; Black bold: positive correlations.
